# Supplementary material for: Chiral poly(l-lactic acid) driven helical self-assembly of oligo(p-phenylenevinylene)
Source: Royal Society of Chemistry journal article supplement (doi:10.1039/c3tc32241f), 2013-12-17

Manuscript submitted to *Journal of Materials Chemistry C*

Supporting information for

**Chiral Poly(L-lactic acid) Driven Helical Self-Assembly of Oligo(*p*-phenylenevinylene)**

**S. Kumari Nisha and S. K. Asha\*<sup>1</sup>**

---

<sup>1</sup> Corresponding Author: S. K. Asha, E-mail: [sk.asha@ncl.res.in](mailto:sk.asha@ncl.res.in) Fax: 0091-20-25902615.

S1.  $^1\text{H}$  NMR spectrum of OPV-2-Diol recorded in  $\text{CDCl}_3$ .

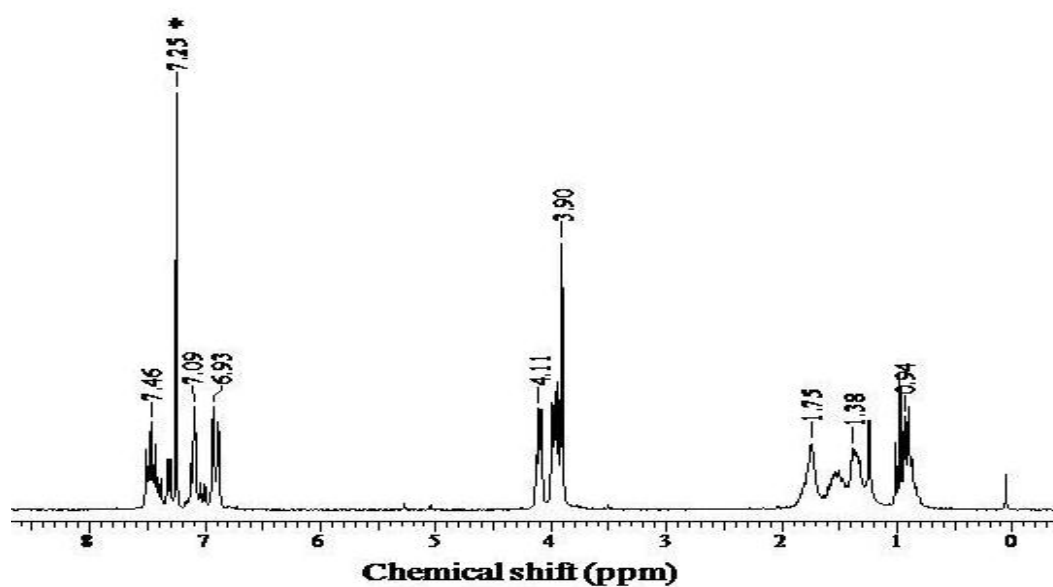

S2. MALDI-TOF of OPV-2-Diol.

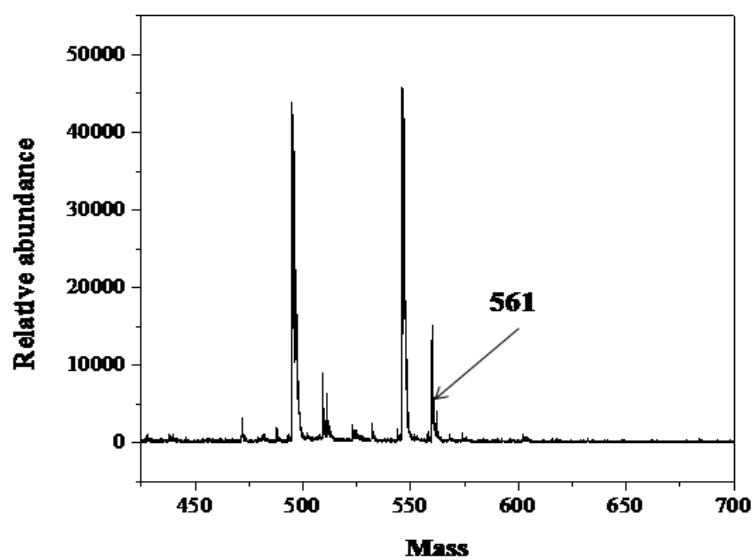

**S3.** The size exclusion chromatography (SEC) of OPV-2-Diol recorded in chloroform ( $\text{CHCl}_3$ ) using polystyrene as standard.

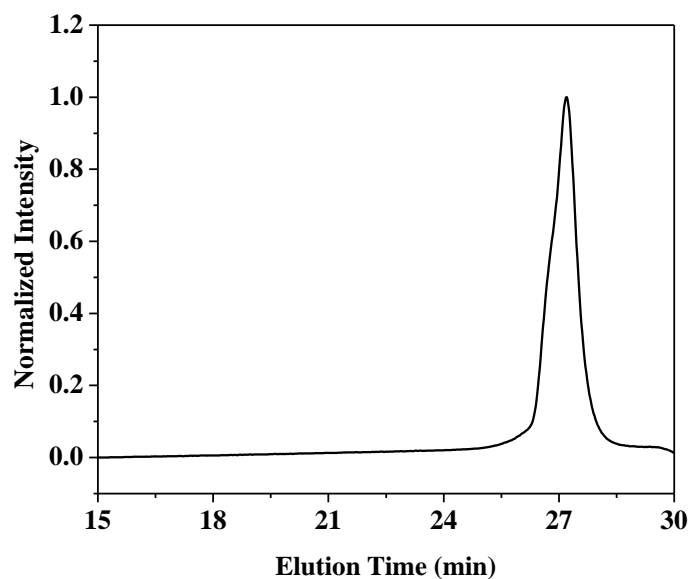

**S4.** TGA thermograms of polymers heated at the rate of  $10\text{ }^\circ\text{C}/\text{min}$  under nitrogen atmosphere.

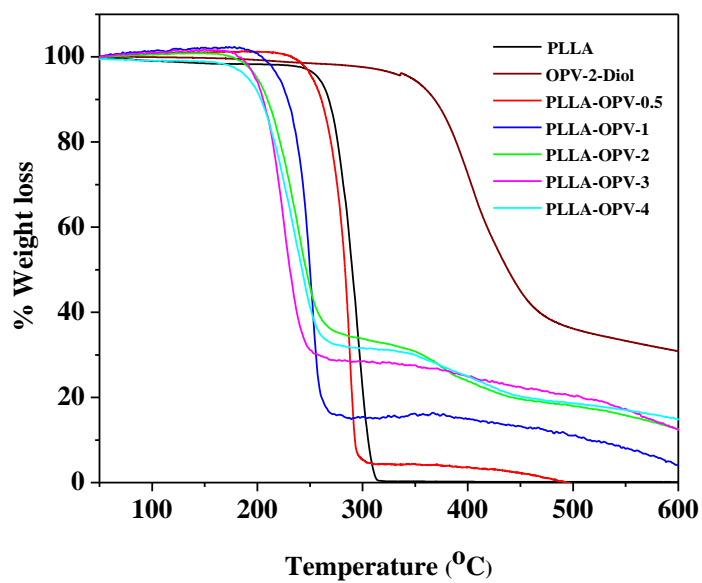

**S5.** The second heating DSC thermograms **PLLA-OPV-2** and **PLLA-OPV-3** at the heating rate of 10 °C/min.

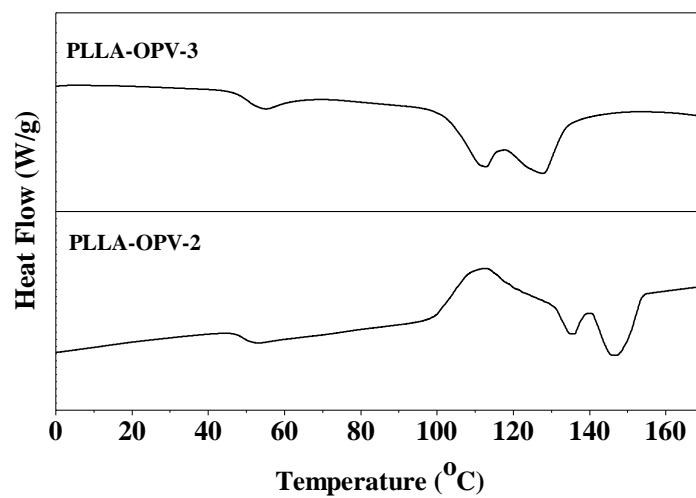

**S6.** WXR traces of **OPV-2-Diol** at room temperature.

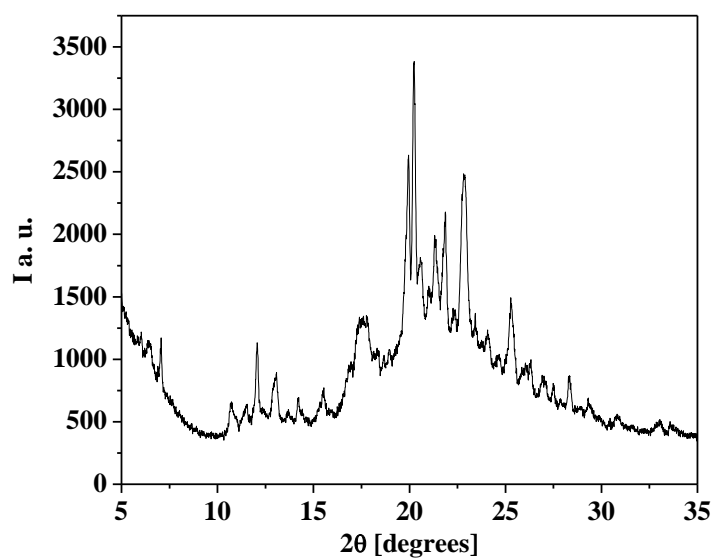

**S7.** Fluorescence lifetime-decay profiles (0.1 OD at 390 nm,  $\lambda_{\text{ex}} = 390$  nm, monitored at 445 nm) of polymers in chloroform at room temperature.

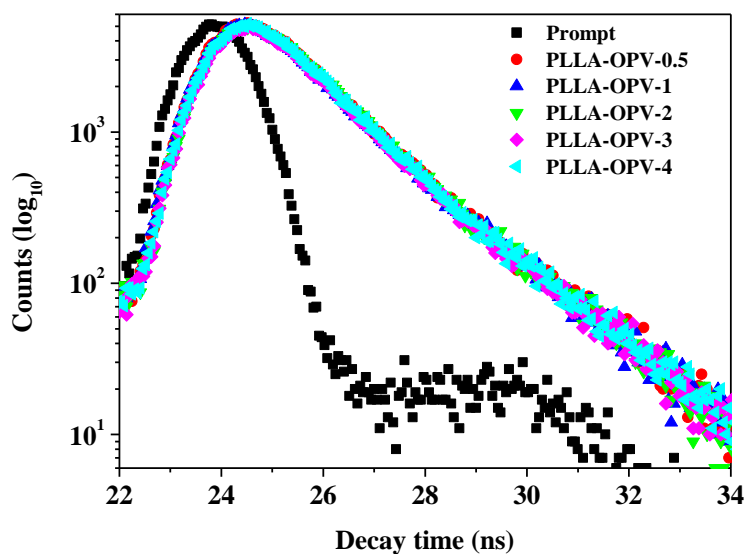

**S8.** Fluorescence lifetime-decay profiles ( $\lambda_{\text{ex}} = 390$  nm, monitored at emission maxima) of polymers in solid state at room temperature.

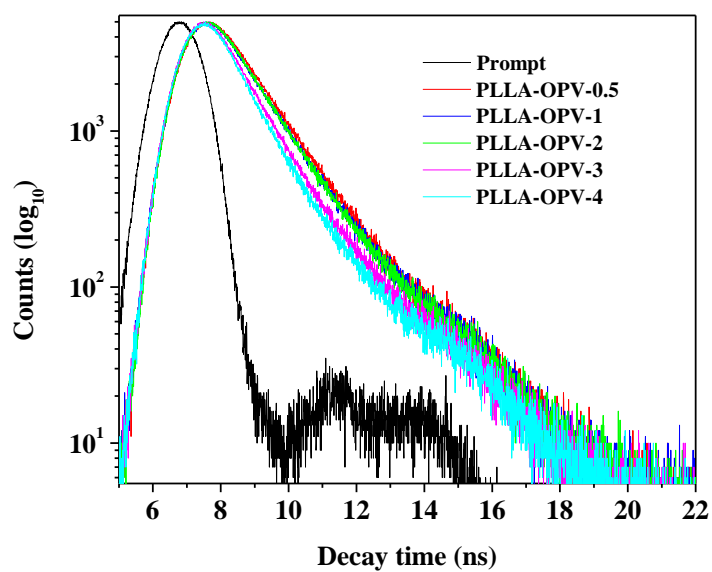

**S9.** CD spectra of copolyesters in solution state (2 mg/mL) recorded in chloroform at 25 °C.

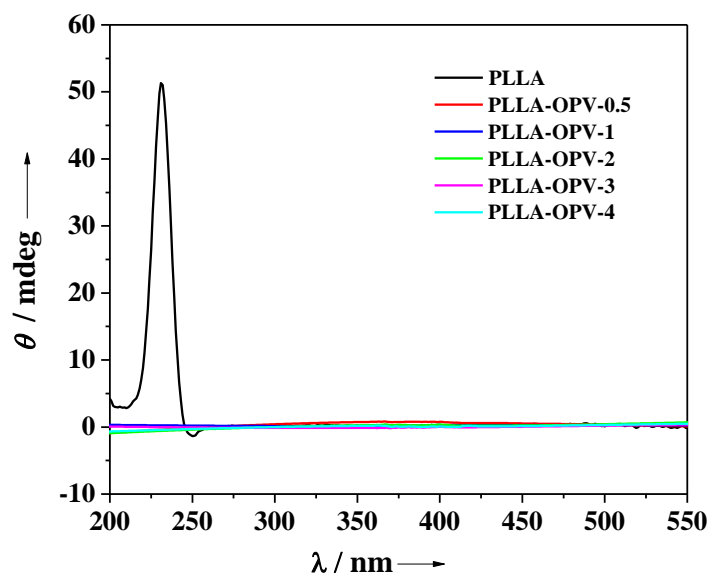

**S10.** Tapping mode AFM height images of the solution-precipitated aggregate of **PLLA-OPV-3** under different magnifications. The corresponding height section analysis is also shown.

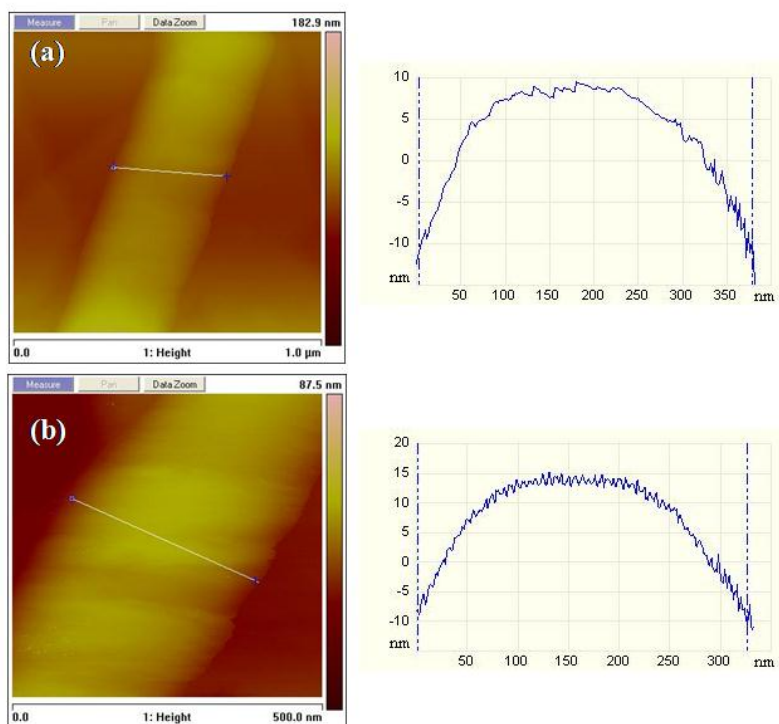

Supplement: c3tc32241f.pdf [file c3tc32241f.pdf]
